1  
2  
3  
4  
5  
6  
7  
8  
9  
10  
11  
12  
13  
14  
15  
16  
17  
18  
19  
20  
21  
22  
23  
24  
25  
26  
27  
28  
29  
30  
31  
32  
33

**Tension-dependent stretching and folding of ZO-1 controls the localization of its interactors**

Domenica Spadaro<sup>1,2</sup>, Shimin Le<sup>3,4</sup>, Thierry Laroche<sup>5</sup>, Isabelle Mean<sup>1,2</sup>, Lionel Jond<sup>1,2</sup>,  
Jie Yan<sup>3,4</sup> and Sandra Citi<sup>1,2</sup>

1- Department of Cell Biology, 2- Institute of Genomics and Genetics of Geneva (iGE3), University of Geneva, Switzerland, 3- Department of Physics, National University of Singapore, Singapore, 4- Mechanobiology Institute, National University of Singapore, Singapore, 5- EPFL School of Life Sciences PTBIOP, Lausanne, Switzerland.

Keywords: ZO-1, ZO-2, tension, DbpA, occludin

Correspondence: Prof. Sandra Citi, Department of Cell Biology, University of Geneva, 4 Boulevard d'Yvoy, 1211-4 Geneva, Switzerland. Tel: +41 22 379 61 82. E-mail: [sandra.citi@unige.ch](mailto:sandra.citi@unige.ch)

Running title: Force-dependent stretching of ZO proteins

34           **Tensile forces regulate epithelial homeostasis, but the molecular**  
35           **mechanisms behind this regulation are poorly understood. Using structured**  
36           **illumination microscopy and proximity ligation assays we show that the tight**  
37           **junction protein ZO-1 undergoes actomyosin tension-dependent stretching and**  
38           **folding in vivo. Magnetic tweezers experiments using purified ZO-1 indicate that**  
39           **pN-scale tensions (~2-4 pN) are sufficient to maintain the stretched conformation**  
40           **of ZO-1, while keeping its structured domains intact. Actomyosin tension and**  
41           **substrate stiffness regulate the localization and expression of the transcription**  
42           **factor DbpA and the tight junction membrane protein occludin in a ZO-1/ZO-2-**  
43           **dependent manner, resulting in modulation of gene expression, cell proliferation,**  
44           **barrier function and cyst morphogenesis. Interactions between the N-terminal**  
45           **(ZPSG) and C-terminal domains of ZO-1 prevent binding of DbpA to the ZPSG,**  
46           **and folding is antagonized by heterodimerization with ZO-2. We propose that**  
47           **tensile forces regulate epithelial homeostasis by activating ZO proteins through**  
48           **stretching, to modulate their protein interactions and downstream signaling.**

49           Both extrinsic mechanical forces, acting on cadherins and integrins, and  
50           intrinsic forces, generated by the actomyosin cytoskeleton, control epithelial  
51           homeostasis, through the regulation of adhesion and barrier functions, cytoskeletal  
52           organization, cell proliferation and morphogenesis<sup>1-6</sup>. Mechanosensing proteins at  
53           adherens and cell-substrate junctions respond to tension by changing their  
54           conformation, leading to their enhanced association with actin filaments and actin-  
55           binding proteins, and mechanical strengthening of adhesion<sup>7-10</sup>. Although the  
56           polymerization and contractility of the cytoplasmic actomyosin cytoskeleton  
57           modulates the nuclear shuttling of transcription factors<sup>11-14</sup>, it is not clear whether the  
58           circumferential actomyosin cytoskeleton associated with tight junctions can regulate  
59           signaling by transcription factors. Furthermore, although actomyosin contractility  
60           modulates TJ barrier function<sup>15-17</sup>, it is not known whether any TJ protein can  
61           respond to tension by stretching and folding, and whether and how this could affect  
62           barrier function.

63           ZO-1 and ZO-2<sup>18,19</sup> are cytoplasmic components of TJ, and play a key role in  
64           anchoring the junctional actomyosin cytoskeleton to TJ membrane proteins, through  
65           the direct interaction of their C-terminal regions with actin filaments<sup>15,16</sup>. The N-  
66           terminal moiety of ZO-1 and ZO-2 comprises three PDZ domains, followed by Src  
67           homology-3 (SH3), U5, and guanylate kinase (GUK) domains<sup>20</sup>. The PDZ1 and

68 PDZ3 domains bind to the integral TJ membrane proteins claudin(s) and JAM,  
69 respectively<sup>20-25</sup>, and the PDZ2 domain promotes heterodimerization between ZO-1  
70 and either ZO-2 or ZO-3, another member of the ZO family of proteins<sup>15, 26</sup>. The  
71 region of ZO-1 comprising PDZ3, SH3, U5 and GUK domains (ZPSG-1) interacts  
72 with the transmembrane TJ protein occludin<sup>15, 23, 27, 28</sup>, the transcription factor  
73 DbpA/ZONAB<sup>29</sup>, and other ligands (reviewed in<sup>30</sup>). ZO-1 and ZO-2 are critical for  
74 the junctional recruitment and stabilization of both occludin and DbpA, which in turn  
75 regulate barrier function<sup>31-33</sup>, and gene expression, mRNA stability, cell proliferation  
76 and survival<sup>34-36</sup>, respectively. Because of the function of ZO-1 and ZO-2 as linkers  
77 between TJ membrane proteins and actin filaments, their conformation might be  
78 modulated by tension. In this paper, we provide evidence that mechanical tension  
79 generated by the actomyosin cytoskeleton regulates the conformation of ZO proteins  
80 and their interactions with DbpA and occludin, to modulate gene expression, cell  
81 proliferation, barrier function and epithelial morphogenesis.

82

## 83 **RESULTS**

84

### 85 ***Structured illumination Microscopy and Proximity Ligation Assay demonstrate*** 86 ***force-dependent stretching and folding of ZO-1 in vivo***

87

88 To test the hypothesis that tensile forces generated by the actomyosin  
89 cytoskeleton act on ZO-1 to control its conformation, we expressed ZO-1, tagged with  
90 myc and HA epitopes at its N-terminal and C-terminal ends (Fig. 1a), in the context of  
91 ZO-1-KO mammary epithelial (Eph4) cells, and we used Structured Illumination  
92 Microscopy (SIM) and Proximity Ligation Assay (PLA) to examine the spatial  
93 relationships between the tags either in control cells, or in cells depleted of ZO-2,  
94 with or without treatment with blebbistatin, an inhibitor of myosin activity.  
95 Exogenous ZO-1 was correctly targeted to junctions, and was detected in the  
96 cytoplasm of overexpressing cells (Supplementary Fig. 1a-d). In cells treated with a  
97 control siRNA, the immunofluorescent signals corresponding to the N- and C-  
98 terminal ends of ZO-1 were resolved, regardless of the presence or absence of  
99 blebbistatin (Fig. 1b-c). Plotting the intensity of the fluorescent signals as a function  
100 of the linear distance across the junction (Fig. 1g) showed that the measured shift  
101 between the distribution peaks of green and red fluorescent tags was  $107 \pm 5.5$  nm in

102 cells treated with control siRNA, and  $104 \pm 7.4$  nm in cells treated with control siRNA  
103 and blebbistatin (Fig. 1h). This indicates that the distance between the tags of  
104 exogenous ZO-1 is not affected by tension in cells expressing ZO-2. The fluorescent  
105 signals were also resolved in cells depleted of ZO-2, as long as they were not treated  
106 with blebbistatin (Fig. 1e), and the measured shift was  $90 \pm 19$  nm (Fig. 1g-h). In  
107 contrast, combining depletion of ZO-2 with blebbistatin treatment resulted in red and  
108 green signals that were largely overlapped (Fig. 1f), with a measured shift of  $7.42 \pm 8$   
109 nm (Fig. 1g-h). This demonstrates that upon depletion of ZO-2 combined with  
110 blebbistatin treatment, ZO-1 undergoes a conformational change, whereby the N-  
111 terminal and C-terminal ends come within a closer distance, which does not allow  
112 resolution of the signals by SIM. This indicates that in the absence of ZO-2  
113 actomyosin tension is required to maintain ZO-1 in a stretched conformation, and that  
114 in the absence of tension ZO-1 undergoes intramolecular folding. Imaging of  
115 multicolor microspheres (Fig. 1d) showed a technical chromatic shift in the xy plane  
116 ranging from  $15 \pm 13$  nm at the center of the field to  $55 \pm 7$  nm at the edges of the field,  
117 excluding the possibility the shifts observed between myc and HA tag signals were  
118 artifacts. Taking this shift into account, our results indicate that when in the stretched  
119 conformation, the length of ZO-1 is between 80 and 120 nm.

120 To confirm the tension-dependent changes in ZO-1 conformation, we used  
121 PLA<sup>37</sup> to detect the physical proximity between myc and HA tags of exogenous ZO-  
122 1, under the different experimental conditions (Fig. 1i-j). Little or no PLA signal,  
123 comparable to the negative control, was detected between myc and HA in the absence  
124 of blebbistatin, regardless of the presence or depletion of ZO-2 (arrowheads in Fig. 1i,  
125 myc+HA), indicating that the N-terminal and C-terminal regions of ZO-1 are  $> 30$  nm  
126 apart in the absence of blebbistatin. In contrast, in the presence of blebbistatin, the  
127 PLA signal between myc and HA tags was dramatically increased upon depletion of  
128 ZO-2, and was detectable both at cell-cell junctions, and in the cytoplasm of  
129 overexpressing cells (arrows in Fig. 1j, myc+HA, si-ZO-2, and quantification in  
130 Supplementary Fig. 1e-f). This indicates that the N-terminal and C-terminal regions of  
131 ZO-1 are within 30-40 nm distance when actomyosin contractility and ZO protein  
132 heterodimerization are inhibited. In summary, these experiments show conformational  
133 changes of ZO-1 in vivo, which indicate that ZO-1 can exist in stretched and folded  
134 conformations, depending on actomyosin tension and heterodimerization with ZO-2.

135

136 ***The structured domains of ZO-1 are mechanically unfolded in vitro at forces >***

137 ***5pN***

138

139 To probe the mechanical stability of ZO-1, we purified recombinant, full-  
140 length ZO-1 from baculovirus-infected insect cells, and applied force to single  
141 molecules, using magnetic tweezers<sup>38,39</sup> (Fig. 2a). When force was linearly increased  
142 with a loading rate of 1 pN/s, the domains of ZO-1 were mechanically unfolded at  
143 forces of 5-45 pN, as indicated by multiple extension steps (Fig. 2b, red and blue  
144 curves). The unfolded domains of ZO-1 could be refolded at forces <5 pN, with a  
145 loading rate of -0.3 pN/s (Fig. 2b, black curves, and inset). These results suggest that  
146 forces of several pN to tens of pN can cause unfolding of structured domains within  
147 full-length ZO-1. Based on the step sizes of all the unfolding events, we estimate that  
148 800-900 residues, which span about 50% of the full-length ZO-1 sequence, and likely  
149 correspond to the N-terminal half of ZO-1, are in a stably folded conformation at  
150 forces <5 pN. The rest of the molecule, likely the C-terminal half of the molecule, is  
151 either in an intrinsically disordered conformation, or mechanically too weak to be  
152 determined in our experiments. Assuming that structured domains occupy half of the  
153 residues in full-length ZO-1, and the other half is in a flexible disordered  
154 conformation, we estimate that a force of ~ 2-4 pN is needed to maintain the stretched  
155 conformation of ZO-1, with an N-to-C distance of ~100 nm, estimated on the basis of  
156 SIM experiments (Fig. 1). This force is significantly smaller than that needed to  
157 unfold the structured domains (> 5 pN, Fig. 1b).

158

159 ***The stretched conformation of ZO proteins promotes the junctional localization of***

160 ***DbpA and occludin in vivo***

161

162 Next, we explored the biological consequences of ZO-1 stretching and  
163 folding. ZO-1 and ZO-2 recruit the transcription factor DbpA and the transmembrane  
164 protein occludin to TJ, by binding to them through its ZPSG (PDZ3-SH3-U5-GUK)  
165 domain. We asked whether promoting the folded conformation of ZO-1, by depleting  
166 cells of ZO-2 and treating them with blebbistatin, impacted on the junctional  
167 accumulation of DbpA and occludin (Fig. 3). In the absence of blebbistatin, DbpA  
168 was detected at junctions both in WT cells, and in cells depleted of ZO-2 (arrows in  
169 Fig. 3a). However, upon treatment with blebbistatin, DbpA labeling was strongly

170 reduced at junctions of ZO-2-depleted cells (arrowheads in Fig. 3b, and quantification  
171 in Fig. 3c), but not WT cells (arrows in Fig. 3b, and quantification in Fig. 3c).  
172 Immunoblot analysis showed that DbpA levels were reduced in cells depleted of ZO-  
173 2 and treated with blebbistatin (red box in Fig. 3d), phenocopying the proteolytic  
174 degradation observed in ZO-1-KO cells depleted of ZO-2<sup>36</sup>. Similarly, junctional  
175 labeling for occludin was normal in WT and ZO-2-KD cells in the absence of  
176 blebbistatin (arrows in Fig. 3e), but was dramatically reduced in the presence of  
177 blebbistatin, only in ZO-2-KD cells (arrowheads in Fig. 3f). Thus, experimental  
178 conditions that lead to the folded conformation of ZO-1 (Fig. 1) result in decreased  
179 localization of DbpA and occludin at junctions, indicating that binding between the  
180 ZPSG region of ZO-1 and its interactors is inhibited in vivo when ZO-1 is in a folded  
181 conformation.

182 Since DbpA and occludin interact with both ZO-1 and ZO-2<sup>15, 23, 36, 40</sup>, we  
183 used ZO-1-KO cells to ask whether tension affects not only ZO-1 dependent, but also  
184 ZO-2-dependent accumulation of DbpA and occludin at junctions (Supplementary  
185 Fig. 2). Furthermore, in addition to blebbistatin, we tested different drugs that affect  
186 the organization of the actin cytoskeleton. Specifically, we treated mixed cultures of  
187 wild-type (WT) and ZO-1-KO cells with either latrunculin A, which prevents the  
188 polymerization of actin filaments, CK-666, which inhibits Arp2/3-dependent  
189 nucleation of branched actin filaments, SMIFH2, which inhibits the formin-dependent  
190 nucleation of bundled actin filaments (Supplementary Fig. 2a), and blebbistatin  
191 (Supplementary Fig. 2b). DbpA was localized at junctions of ZO-1-KO cells (arrows  
192 in Supplementary Fig. 2a-control) when cells were not treated with drugs, consistent  
193 with the notion that ZO-2 alone, in the absence of ZO-1, can sequester DbpA at  
194 junctions of confluent cells<sup>36</sup>. However, upon treatment with latrunculin A, SMIFH2,  
195 but not CK-666, DbpA was undetectable at junctions of ZO-1-KO, but not of WT  
196 cells (arrowheads in Supplementary Fig. 2a – LAT-A, SMIFH2 and arrow in  
197 Supplementary Fig. 2a – CK-666). The lack of activity of CK-666 indicated that  
198 branched actin filament polymerization is not involved in modulating ZO-mediated  
199 junctional sequestration of DbpA. Similarly, treatment of mixed WT/ZO-1-KO cells  
200 with blebbistatin induced a loss of junctional DbpA only in cells expressing one ZO  
201 protein, but not in WT cells (arrowheads in Supplementary Fig. 2b - BL).  
202 Phenocopying what was observed in cells depleted of both ZO proteins<sup>36</sup>, DbpA  
203 protein levels were decreased in ZO-1-KO cells treated with blebbistatin (red box in

204 Supplementary Fig. 2c and quantification in Supplementary Fig. 2d), and normal  
205 DbpA levels were rescued by treatment with the proteasome inhibitor MG132 (green  
206 box in Supplementary Fig. 2c and quantification in Supplementary Fig. 2d), leading to  
207 detection of DbpA in the cytoplasm and nucleus of ZO-1 KO cells (“n” in panel  
208 BL/MG, Supplementary Fig. 2b). Occludin was also localized at junctions of both  
209 WT and ZO-1-KO cells (arrows in Supplementary Fig. 2e, control), but, upon  
210 treatment with blebbistatin, occludin labeling was decreased at junctions of ZO-1-KO,  
211 but not WT cells (arrowheads in Supplementary Fig. 2e, BL). Proximity ligation assay  
212 (PLA) was used as an additional assay to detect proximity between ZO-1 and  
213 occludin (Supplementary Fig. 2f-g). In the absence of blebbistatin, ZO-1 and occludin  
214 were in close proximity, regardless of ZO-2 depletion (arrows in Supplementary Fig.  
215 2f). However, in the presence of blebbistatin, ZO-1 was associated with occludin only  
216 in the presence, but not in the absence of ZO-2 (arrows and arrowheads in  
217 Supplementary Fig. 2g).

218 In summary, these experiments show that loss of either bundled actin filament  
219 organization or myosin activity in cells lacking one ZO protein results in the loss of  
220 junctional localization of DbpA and occludin, suggesting loss of interaction with the  
221 remaining ZO protein. The results also suggest that, similarly to ZO-1, ZO-2  
222 undergoes tension-dependent stretching, and that stretching activates both ZO-1 and  
223 ZO-2, and promotes their binding to DbpA and occludin.

224

### 225 ***Tension controls cell proliferation and paracellular barrier function*** 226 ***through ZO proteins***

227 To examine the cellular consequences of force-dependent stretching and  
228 folding of ZO proteins, we analyzed the signaling outputs by DbpA and occludin  
229 under the different experimental conditions.

230 Translocation of DbpA to the nucleus promotes cell proliferation, enhances  
231 transcription of cyclin D1 and PCNA, and represses transcription of ErbB2<sup>29, 35</sup>. In  
232 ZO-1-KO cells treated with blebbistatin and MG132, which show nuclear DbpA  
233 labeling (panel BL/MG in Supplementary Fig. 2b) cell proliferation was increased, as  
234 determined by labeling with Ki67, and this increase was reduced upon depletion of  
235 DbpA (Fig. 4a-b). Under the same conditions, qRT-PCR showed increased expression  
236 of the DbpA target genes cyclin D1 and PCNA (Fig. 4c) and decreased expression of  
237 ErbB2 (Fig. 4d). These changes in gene expression did not occur in ZO-1-KO cells



238 treated with blebbistatin alone (Fig. 4c-d), conditions under which DbpA is not  
239 detected in the nucleus, and DbpA levels are reduced, due to proteasomal degradation  
240 (Supplementary Fig. 2b-c).

241 Occludin contributes to regulating TJ barrier function<sup>31, 41, 42</sup>. Measurement of  
242 TJ barrier function showed that in the absence of blebbistatin no significant  
243 differences were observed in permeability either to ions (TER, Fig. 4e) or to larger  
244 molecules ( $P_{app}$ , Fig. 4f), of WT versus ZO-1-KO Eph4 cells (see also<sup>43</sup>). However,  
245 blebbistatin induced an increase in the TER of WT cells, and this increase was  
246 significantly lower in ZO-1-KO cells (TER, Fig. 4e). In addition, blebbistatin  
247 treatment did not influence the flux of FITC-dextran across monolayers of WT cells,  
248 whereas it induced an increased flux in ZO-1-KO cells (Fig. 4f), suggesting that the  
249 barrier is more sensitive to actomyosin tension when only ZO-2 is expressed.

250 Taken together, these results suggest that in cells expressing only one ZO  
251 protein the organization and contractility of the actomyosin cytoskeleton, which  
252 promotes stretching and activation of ZO proteins, is required to support both DbpA-  
253 dependent regulation of gene expression and occludin-dependent modulation of  
254 barrier function.

255

### 256 ***Substrate stiffness and actomyosin contractility modulate epithelial proliferation*** 257 ***and cyst growth in 3D culture through ZO proteins***

258 Since substrate stiffness influences intracellular tension, we examined cyst  
259 morphogenesis in 3D cultures of Eph4 cells grown in Matrigel, a softer and more  
260 physiological substrate, compared to glass coverslips<sup>44, 45</sup>. WT Eph4 cells formed  
261 cysts with a central lumen, and their size increased to an average diameter of 250  $\mu$ m  
262 within 21 days (Fig. 5a,e). In contrast, ZO-1-KO cells formed cysts, which grew  
263 slowly in Matrigel, and had an average diameter of 50  $\mu$ m and no lumen after 21 days  
264 (Fig. 5c,e). This suggests that under these conditions ZO-2 is folded (inactive),  
265 leading to loss of binding and degradation of DbpA, and decreased proliferation and  
266 growth. These results also indicate that growth on a soft substrate phenocopies  
267 treatment of cells growing on coverslips with blebbistatin. Next, we asked whether  
268 this phenotype of ZO-1-KO cysts could be rescued by artificially enhancing  
269 actomyosin contractility. To this purpose, we incubated cells in 2'-deoxyadenosine-5-  
270 triphosphate (dATP)<sup>46, 47</sup>. Addition of dATP did not affect the growth rate and size of  
271 WT cysts (Fig. 5b,e). In contrast, it rescued the stunted growth phenotype of ZO-1-



272 KO cells, resulting in cyst growth and size similar to WT cells (Fig. 5d,e). This  
273 suggests that ZO-2 can be activated by stretching, induced by increased actomyosin  
274 contractility. Immunoblotting showed that DbpA protein levels were reduced by about  
275 80% in ZO-1-KO cysts, compared to WT, suggesting proteolytic degradation, and this  
276 was rescued by treatment with dATP (red and green boxes in Fig. 5f).  
277 Immunofluorescence showed that in WT cells DbpA was localized in the nucleus at  
278 early time points (Fig. 5g), whereas at later stages it was localized at junctions (Fig.  
279 5h), both in the presence and absence of dATP. In contrast, DbpA was undetectable  
280 by immunofluorescence in ZO-1-KO cysts both at early (Fig. 5i) and late (Fig. 5j)  
281 time points. Significantly, dATP rescued both the expression (Fig. 5f) and the  
282 localization of DbpA at all time points (Fig. 5i-j), correlating with increased cyst  
283 growth (Fig. 5d). Labeling for E-cadherin showed expression and localization at cell-  
284 cell contacts in both WT and ZO-1-KO cells, independently of dATP, suggesting that  
285 cells lacking ZO-1 can still form adherens junctions (Fig. 5g-j).

286

287 ***Intramolecular interactions within ZO proteins prevent their binding to DbpA and***  
288 ***occludin, and are inhibited by heterodimerization***

289

290 Folding of ZO proteins might be the result of an intramolecular interaction  
291 between their C-terminal and N-terminal regions, which masks the DbpA and  
292 occludin binding sites on the ZPSG domains. To test this hypotheses, we first  
293 established which ZO protein interacts with DbpA and occludin in in vitro assays.  
294 Either GST-DbpA or GST fused to the C-terminal region of occludin were used as  
295 baits, and GFP-tagged ZPSG regions of ZO-1 (ZPSG-1, residues 417-806), ZO-2  
296 (ZPSG-2, 509-880), and ZO-3 (ZPSG-3, 369-750) were used as preys (Supplementary  
297 Fig. 3a). DbpA interacted with ZPSG-1 and ZPSG-2, but not with ZPSG-3  
298 (Supplementary Fig. 3b), whereas all ZPSG regions interacted with GST-occludin  
299 (Supplementary Fig. 3c).

300 Next, we focused on ZO-1 and ZO-2, and asked whether intramolecular  
301 interactions between their ZPSG and C-terminal regions can occur, using GST  
302 pulldown assays (Fig. 6 a-b for ZO-1 and Fig. 6c-d for ZO-2). Different constructs of  
303 the C-terminal region of ZO-1 interacted with ZPSG-1, the strongest signal being  
304 observed with the most C-terminal fragment of ZO-1 (1619-1748) (Fig. 6b).

305 Similarly, the bacterially expressed C-terminal region of ZO-2 (890-1190) interacted  
306 with the ZPSG-2 region (Fig. 6d).

307 Next, we asked whether the interaction of the C-terminal region of ZO-1 with  
308 ZPSG-1 inhibits the binding of ZPSG-1 to either DbpA or occludin. To this purpose,  
309 we carried out competition GST pulldown assays, using HA-tagged DbpA as a prey,  
310 either in the absence, or in the presence of increasing amounts of competing C-  
311 terminal fragments of ZO-1 (Fig. 6e-g). The interaction of DbpA with ZPSG-1 was  
312 not inhibited by GFP alone, but was inhibited by GFP-tagged fragments comprising  
313 different regions of the C-terminal region of ZO-1, the most C-terminal fragment  
314 (residues 1619-1748) being the most effective (Fig. 6e). Importantly, both the ZO-1  
315 C-terminal fragment (1619-1748) and DbpA bind to the SH3 domain within the  
316 ZPSG-1 (Supplementary Fig. 4a-b), accounting for their reciprocal inhibition of  
317 binding. The calculated dissociation equilibrium constants ( $K_{ds}$ ) for the interaction of  
318 ZPSG-1 with the ZO-1 C-terminal fragment (1619-1748) and with DbpA were 66 nM  
319 and 100 nM, respectively, on the basis of a supernatant depletion assay and  
320 (Supplementary Fig. 4g-j). Similarly, DbpA but not CFP inhibited the interaction  
321 between the ZPSG region of ZO-2 (ZPSG-2) and the C-terminal region of ZO-2 (890-  
322 1190) (Supplementary Fig. 4d-f). Competition pulldown assays were also carried out  
323 using the C-terminal region of occludin as a prey (Fig. 6h-j). The GFP-tagged C-  
324 terminal region of ZO-1 (1619-1748) (Fig. 6h), but not GFP alone (Fig. 6i) inhibited  
325 the interaction between ZPSG-1 and the C-terminal region of occludin. Taken  
326 together, these data indicate that interactions between the C-terminal and ZPSG  
327 domains within ZO proteins can inhibit binding of the ZPSG domains to DbpA and  
328 occludin.

329 Full-length ZO-1 does not interact with GST-DbpA in pulldown assays <sup>36</sup>.  
330 Since ZO-1 and ZO-2 form heterodimers through their PDZ2 domains <sup>15, 26</sup>, and  
331 heterodimerization promotes the junctional localization of DbpA under low tension  
332 conditions (Fig. 1, Fig. 3), we asked whether heterodimerization promotes the  
333 interaction of full-length ZO-1 with DbpA in vitro. Using GST-DbpA as a bait, we  
334 detected ZO-1 in pulldowns when increasing amounts of vsv-tagged full-length ZO-2  
335 (Fig. 6k), but not vsv-tagged p114-RhoGEF (negative control, Fig. 6l), were added.  
336 This suggested that heterodimerization stabilizes the stretched conformation, and  
337 makes the ZPSG region available for binding to its ligands in vitro.

338

## 339 **DISCUSSION**

340

341 The organization of the actomyosin cytoskeleton at cell-cell junctions is  
342 critical for barrier function, adhesion, polarity, and differentiation. Mechanical tension  
343 affects cell behaviour, as shown by studies revealing key roles for  $\alpha$ -catenin, vinculin  
344 and myosin in mechanotransduction. In this paper we investigate ZO-1 and ZO-2,  
345 which are good candidates for being transducers of junctional tension, since they  
346 directly link actin filaments to transmembrane TJ proteins, and are pivotal for  
347 junctional actomyosin organization, through their interaction with actin-binding  
348 proteins, such as cortactin, cingulin and  $\alpha$ -catenin, and with regulators of Rho  
349 GTPases, such as Toca-1, ArhGEF11, and others<sup>15, 48-54</sup>.

350 Our results provide the first evidence that ZO-1 can exist in vivo in different  
351 tension-dependent conformations, and that ZO proteins can transduce force into  
352 altered binding to physiological interactors, correlating with different effects on cell  
353 behaviour. We conclude that in WT cells ZO protein heterodimerization stabilizes the  
354 stretched conformation, allowing interaction of the ZPSG regions with DbpA and  
355 occludin both at higher (Fig. 7a) and lower (Fig. 7b) levels of actomyosin-dependent  
356 tension. In contrast, in cells expressing only one ZO protein, junctional tension is  
357 necessary to promote stretching and ZPSG interaction with DbpA and occludin (Fig.  
358 7c). Reducing actomyosin contractility in these cells, either by culture on a soft  
359 substrate, or by treatment with actomyosin-active drugs, leads to intramolecular  
360 folding of the ZO protein, destabilization of junctional occludin, and proteasomal  
361 degradation of DbpA (Fig. 7d). If DbpA degradation is prevented by MG132, DbpA  
362 can translocate into the nucleus, to regulate gene expression and promote proliferation  
363 (Fig. 7d).

364 We propose that the stretched conformation of ZO proteins is the active,  
365 conformation, which promotes interaction with DbpA, occludin, and other ligands,  
366 through their ZPSG domain. The ZPSG region of ZO-1 has several additional  
367 interactors:  $\alpha$ -catenin<sup>16, 27, 55</sup>, JAM<sup>21</sup>, G $_{\alpha 12}$ <sup>56</sup>, Apg-2<sup>57</sup>, and Shroom2<sup>58</sup>. Future  
368 studies should address whether these interactions, and their downstream signaling,  
369 can be modulated negatively by ZO-1 folding, and positively by tension- and  
370 heterodimerization-induced stretching. According to our model, the folded  
371 conformation of ZO-1 and ZO-2 represents their inactive form, in which the ZPSG  
372 domain is unable to bind to physiological interactors, due to the competition by the C-

373 terminal domain. Interestingly, some of the ZO-1 interactors, such as  $\alpha$ -catenin, are  
374 not localized at TJ, but at AJ. Since ZO-1 has been localized at AJ both in cell culture  
375 models<sup>59</sup> and in tissues<sup>60</sup>, this raises the possibility that force-dependent modulation  
376 of ZO-1 may be important in AJ assembly, and its linkage to the actin cytoskeleton.

377 FRAP studies show that the association of ZO-1 with the TJ membrane is  
378 dynamic, with a soluble cytoplasmic pool in equilibrium with a membrane-associated  
379 pool<sup>61</sup>. It remains to be determined whether the cytoplasmic pool of ZO-1,  
380 exchanging with the TJ membrane, as well as monomeric ZO-1 that traffics to the  
381 membrane during junction biogenesis, is or is not in a monomeric folded  
382 conformation. Our SIM and PLA results indicate that folded ZO-1 can be detected  
383 both at junctions and in the cytoplasm, suggesting that folded ZO-1 molecules can  
384 remain anchored to the membrane, presumably through interactions of their PDZ1  
385 and PDZ3 domains with claudins and JAM-A, respectively (Fig. 7d).  
386 Activation/stretching of ZO proteins, either through heterodimerization and/or  
387 through increases in actomyosin contractility (in the physiological range, <5 pN),  
388 could be a useful mechanism to coordinate the assembly of the TJ scaffold<sup>25</sup> with its  
389 linkage to the actin cytoskeleton. Post-translational modifications may also contribute  
390 to regulating ZO protein stretching/folding, for example by modulating the affinity of  
391 interaction between the C-terminal region and/or the ZPSG with different interactors.

392 ZO protein stretching and folding in response to extrinsic or intrinsic  
393 mechanical cues may be relevant to the role of ZO proteins in development and  
394 disease. For example, down-regulation of one or both ZO proteins has frequently been  
395 observed in cancer (reviewed in<sup>62</sup>), and substrate stiffness/softness may differentially  
396 affect the proliferation and survival of cells expressing one or both ZO proteins. In  
397 addition, although epithelial tissues typically express either two or three ZO proteins  
398<sup>63</sup>, ZO-1 is the only ZO protein expressed in cells of mesodermal origin<sup>64</sup> and in  
399 extraembryonic mesoderm of mouse embryos<sup>65</sup>. Thus, the early embryonic lethal  
400 phenotype of ZO-1-KO mice<sup>65</sup> could be explained by lack of tension-dependent  
401 signaling by ZO-1, leading to impaired proliferation of extraembryonic tissues. The  
402 early embryonic lethal phenotype of ZO-2-KO mice<sup>66</sup> might instead indicate a  
403 requirement for ZO-1/ZO-2 heterodimerization in the morphogenesis of a soft  
404 embryonic tissue. Conversely, since epithelial cells lacking ZO-2 can populate  
405 epithelial organs in chimeric mice<sup>66</sup>, either ZO-1/ZO-3 heterodimerization<sup>28</sup> or  
406 higher tension might compensate for the lack of ZO-2 in adult tissues.

407 In summary, we propose that activation of ZO proteins by stretching is a new  
408 mechanism of cross-talk between the contractile cytoskeleton and junctions, through  
409 which tensile forces are transduced into downstream signaling by regulating the  
410 junctional localization of interactors of the ZPSG regions of ZO proteins. This could  
411 be one among different mechanisms through which mechanical forces regulate  
412 morphogenesis and homeostasis of epithelial and endothelial tissues.

413

#### 414 ACKNOWLEDGEMENTS

415 We are grateful to all colleagues who provided cell lines and reagents, and especially  
416 to Prof. S. Tsukita for the gift of ZO-1 KO cells. This work was supported by the  
417 Canton and Republic of Geneva and the Swiss National Foundation (grant n.  
418 31003A\_152899 to SC) and the National Research Foundation (NRF), Prime  
419 Minister's Office, Singapore under its NRF Investigatorship Programme (NRF  
420 Investigatorship Award No. NRF-NRFI2016-03 to JY).

421

422

#### 423 AUTHOR CONTRIBUTIONS

424 D.S. and S.C. conceived and designed the project, analyzed the data, and wrote the  
425 manuscript. D.S. prepared constructs and carried out most experiments. S.L. and J.Y.  
426 carried out magnetic tweezers experiments. I.M. and L.J. prepared constructs. T.L and  
427 D.S performed SIM imaging.

428

#### 429 COMPETING FINANCIAL INTERESTS

430 The authors declare no competing financial interests.

431

432 **FIGURE LEGENDS**

433 **Figure 1. Detection of stretched and folded ZO-1 conformations in vivo by SIM**  
434 **and PLA.**

435 **(a-h) Detection of conformational changes in ZO-1 by SIM.** (a) Schematic  
436 representation of exogenous myc-ZO-1-HA used to transfect Eph4 cell lines. (b-c)  
437 SIM images (3D-stacks) of ZO-1-KO Eph4 cells expressing exogenous myc-ZO-1-  
438 HA, and treated with control siRNA either in the absence (b) or in the presence (c) of  
439 blebbistatin. (e-f) SIM images of ZO-1-KO Eph4 cells expressing exogenous myc-  
440 ZO-1-HA, depleted of ZO-2 in the absence of blebbistatin (e), or in the presence of  
441 blebbistatin (f). Cells were labeled with anti-myc and anti-HA antibodies (red and  
442 green signals, respectively), and three representative images for each condition are  
443 shown (cell 1, cell 2, cell 3). Green and red arrows in magnified insets (b, c, e)  
444 indicate spatially resolved labeling of myc (red) and HA (green) epitopes at the N-  
445 and C-terminus of ZO-1, respectively. Yellow arrows in (f) indicate spatially  
446 overlapping signals for myc and HA. (d) Multicolor TetraSpeck Fluorescent  
447 microspheres (arrow in inset) used as internal control to measure the chromatic shift  
448 (xy plane). (g) Linescan mean plots (shaded error areas) of fluorescent intensities of  
449 fluorophore signals, as a function of distance, corresponding to images of cells in (e,  
450 f). The distances (horizontal segments) between vertical lines (maximum intensity  
451 peaks) correspond to calculated distances between red and green peaks of  
452 fluorescence. (h) Histogram plotting calculated distance between peaks of  
453 fluorescence intensities of myc and HA epitopes in all SIM images (b-f and others not  
454 shown), as a function of experimental treatments (indicated below the histogram).  
455 Error bars indicate standard error (n=30 linescans for each experimental condition).

456 **(i-j) Detection of conformational changes in ZO-1 by PLA.** Depletion of ZO-2  
457 plus blebbistatin treatment increases proximity between the N-terminal and C-  
458 terminal ends of ZO-1. Eph4 ZO-1-KO cells expressing myc-ZO1-HA were either not  
459 treated (i) or treated with blebbistatin (j) and analyzed by PLA. Antibodies for PLA  
460 were myc and phospho-histone-H3 (myc + p-H3, negative control), myc and HA  
461 (myc+HA, experimental). Top panels=control siRNA. Bottom panels = si-ZO-2.  
462 Arrows and arrowheads indicate strong or weak PLA signal, respectively.

463 **Figure 2 (a-b) Force-dependent unfolding and refolding dynamics of full-length**  
464 **ZO-1. (a)** Schematic representation of molecular tweezers experimental configuration  
465 (left): ZO-1 molecule was immobilized on the substrate, and force was applied.  
466 Schematic domain organization of ZO-1 (right) with structured domains in the N-  
467 terminal regions, and disordered C-terminal region. **(b)** Typical force-extension  
468 curves of ZO-1 unfolding (red and blue tracings) and refolding (black). Each  
469 extension jump of the colored curves indicates an unfolding of a domain or sub-  
470 domain during force-increase scans (with a loading rate of 1 pN/s). Bottom Inset  
471 shows the zoom-in of refolding events of ZO-1 during force-decrease scans (with a  
472 loading rate of -0.3 pN/s). The black or colored lines are 5-points FFT smooth of the  
473 raw data (light gray).

474 **Figure 3. The junctional accumulation of DbpA and occludin, and DbpA**  
475 **stability, are regulated by force in a ZO-1-dependent manner.**

476 **(a-c)** Depletion of ZO-2 combined to blebbistatin treatment reduces DbpA  
477 accumulation at junctions. **(a, b)** Immunofluorescent localization of DbpA (green),  
478 ZO-2 (red, to identify depleted cells), PLEKHA7 (blue, internal reference for  
479 junctions) in WT Eph4 cells treated either with si-control (top panels) or si-ZO-2  
480 (bottom panels), either not treated **(a)**, or treated with blebbistatin **(b)**. Each panel is  
481 labeled with the experimental condition (top, si-control or si-ZO-2) and with the  
482 antibody used for labeling (bottom), in the color of the fluorophore  
483 (green=Alexa488/FITC, red=Cy3, blue=Cy5). Arrows and arrowheads indicate  
484 normal or decreased/absent junctional labeling, respectively. Merge panels show  
485 nuclei labeled in blue by DAPI. **(c)** Histogram showing a semiquantitative analysis of  
486 decrease in junctional labeling<sup>67</sup> for the indicated TJ proteins (ZO-2, DbpA) in WT  
487 Eph4 cells treated with blebbistatin, using PLEKHA7 as a reference for junctions.  
488 Treatments were with either si-control or si-ZO-2 ((+) or (-) below the histogram), for  
489 n=3 separate experiments. Asterisks indicate statistical significance, as determined by  
490 Student's T-test (\*\*, p<0.01).

491 **(d)** DbpA protein levels are reduced in WT cells treated with blebbistatin and  
492 depleted of ZO-2. Immunoblot analysis of ZO-2, DbpA, and ZO-1 (and  $\beta$ -tubulin, as  
493 a control protein loading normalization) in si-RNA-treated cells (si-control=blue, si-  
494 ZO-2=red), either untreated or treated with blebbistatin (bleb, - or +).



495 **(e, f)** Occludin junctional localization is decreased in WT cells depleted of ZO-2 and  
496 treated with blebbistatin. Immunofluorescent localization of occludin (red), ZO-2  
497 (green, to identify depleted cells), PLEKHA7 (blue, internal reference for junctions)  
498 in WT Eph4 cells treated either with si-control (top panels) or si-ZO-2 (bottom  
499 panels), either not treated **(e)**, or treated with blebbistatin **(f)**. Arrows and arrowheads  
500 indicate normal or decreased/absent junctional labeling, respectively. Merge panels  
501 show nuclei labeled in blue by DAPI.

502 **Figure 4. Tension controls cell proliferation and paracellular barrier function**  
503 **through ZO proteins.**

504 **(a-b)** The effects of DbpA depletion on cell proliferation depend on tension and ZO  
505 proteins. **(a)** Confluent Eph4 ZO-1-KO cells were transfected with siRNA-control or  
506 siRNA-DbpA and then were treated with the following drugs (NT= not treated,  
507 BL=blebbistatin, BL/MG= blebbistatin + MG132, MG=MG132). The dot-plots show  
508 the percentage of Ki-67 positive cells. (n=200 cells for each treatment). Note that the  
509 percentage of Ki-67 epithelial positive cells was increased upon BL/MG treatment,  
510 and this was abolished by DbpA depletion. **(b)** Immunoblotting showing DbpA  
511 levels in untreated ZO-1-KO cells or in cells treated with BL, BL/MG and MG.  
512 Numbers below the immunoblot indicate the quantification of band intensity by  
513 densitometric analysis. **(c-d)** Treatment of ZO-1-KO cells with blebbistatin results in  
514 altered expression of DbpA-regulated genes. qRT-PCR analysis of mRNA levels,  
515 showing relative expression of Cyclin D1 (blue), PCNA (red) **(c)** and ErbB2 (purple)  
516 **(d)** in ZO1-KO cells, following synchronization of proliferating cells in G1 (sync,  
517 value taken as 100%)<sup>36</sup>, and relative values following different experimental  
518 treatments (NT= not treated, BL=blebbistatin, BL/MG= blebbistatin + MG132,  
519 MG=MG132). Asterisks indicate statistical significance (\*\*, p<0.01), as determined  
520 by Student's T-test (n=3 independent experiments for b-c). WT cells are not shown  
521 since DbpA is always junctional.

522 **(e-f)** Tight junction barrier function of ZO-1-KO but not WT confluent monolayers is  
523 altered in the presence but not in the absence of blebbistatin. Histograms show  
524 transepithelial electric resistance (TER, **(e)**) and permeability to 3 kDa FITC dextran  
525 ( $P_{app}$ , **(f)**) in WT (blue) and ZO-1-KO (red) cells, either untreated (-) or treated with

526 blebbistatin (bleb +). Error bars represent standard deviations (n=3, \*= p≤0.05, \*\*=  
527 p≤0.01, \*\*\*= p≤0.001).

528 **Figure 5. ZO-1 is required for cell proliferation, cyst growth and Dpa**  
529 **accumulation at junctions in Eph4 cells grown in Matrigel.**

530

531 **(a-d)** The growth of ZO-1-KO Eph4 cell cysts is tensio-dependent. **(a and c)**  
532 Brightfield microscopic images of cysts from untreated Eph4 WT **(a)** or ZO-1-KO **(c)**  
533 cells, at different times (4 days to 21 days) after plating, showing reduced growth of  
534 ZO-1-KO cysts. **(b, d)** Cell growth is rescued by dATP treatments in ZO-1 KO cysts.  
535 Eph4 WT **(b)** and ZO-1KO **(d)** cysts were treated with dATP after plating. Asterisks  
536 indicate lumens. Scale bars =50 μm. **(e-f)** Histograms showing average cyst diameter  
537 **(e)** for WT (blue) WT+dATP (light blue), ZO-1-KO (red), and ZO-1-KO (yellow)  
538 cysts. Data are from n=30 cysts, from three independent experiments. Error bars  
539 represent standard deviations. \*\* p≤ 0.01.

540 **(f-j)** DbpA levels are decreased in ZO-1-KO cells grown in Matrigel. **(f)** Immunoblot  
541 analysis of lysates of either untreated or dATP-treated WT or ZO-1-KO cysts (at 21  
542 days after plating), using antibodies against ZO-1, ZO-2, and DbpA (β-tubulin used  
543 for normalization). Numbers on the left in indicate migration of molecular size  
544 markers (kDa). Numbers below each lane indicate densitometry quantification of the  
545 protein. The red box indicates decreased DbpA protein levels in ZO-1-KO cysts. The  
546 green box indicates rescued DbpA protein levels upon treatment of ZO-1-KO cysts  
547 with dATP. **(g-j)** Immunofluorescent localization of DbpA and E-cadherin (to label  
548 junctions) in untreated or dATP-treated WT or ZO-1-KO cysts, at days 4 **(g, i)**, and 21  
549 **(h, j)** after plating in Matrigel. Arrows and arrowheads indicate normal and  
550 reduced/absent staining, respectively. Scale bars=10 μm.

551 **Figure 6. Intramolecular interactions between ZPSG and C-terminal domains of**  
552 **ZO proteins prevent interaction with DbpA**

553 **(a-d)** ZO proteins undergo intramolecular interactions. **(a)** Schematic diagrams of  
554 the domain organization of ZO-1 and of bait and preys used in GST pulldown  
555 experiments. **(b)** Immunoblot analysis, using anti-GFP antibodies, of GST pulldowns,  
556 using either GST or GST-ZPSG-1 as baits, and GFP-tagged C-terminal fragments of  
557 ZO-1 as preys. GFP alone (-) was used as a negative control prey. Normalization of

558 GFP-tagged preys in HEK293T lysates was carried out by immunoblotting with anti-  
559 GFP antibodies (INPUT-prey, **(b)**). **(c-d)** ZO-2 undergoes intramolecular interaction.  
560 **(c)** Schematic diagrams of the domain organization of ZO-2 and bait and prey used  
561 for GST pulldown experiments. **(d)** Immunoblot analysis, using anti-GFP antibodies,  
562 of normalized preys (left) and of GST pulldowns, using either GST or GST fused to  
563 the C-terminal fragment of ZO-2 (890-1190) as a bait, and the GFP-tagged ZPSG-2  
564 region as a prey. GFP-cingulin (CGN) was used as a positive control. Normalization  
565 of GFP-tagged preys in HEK293T lysates was carried out by immunoblotting with  
566 anti-GFP antibodies (INPUT-prey, **(d)**). Bait normalization (GST-ZPSG-1 **(b)**, GST-  
567 ZO-2(890-1190) **(d)**) was carried out by PonceauS staining of blots. Pulldowns are  
568 labeled on top with prey constructs and on bottom with baits. Numbers on the left of  
569 immunoblots indicate migration of molecular size markers (kDa). Dotted green boxes  
570 in **(d)** show prey proteins (normalized inputs). Data are representative of > n=3  
571 independent experiments.

572 **(e-g)** C-terminal fragments of ZO-1 inhibit ZPSG-1 interaction with DbpA. **(e)**  
573 Pulldowns using either GST-ZPSG-1 (top) or GST (bottom, negative control) as baits  
574 and HA-DbpA as prey, either in the absence, or in the presence of competing proteins  
575 (annotated in blue): either GFP, or GFP fused to C-terminal fragments of ZO-1  
576 (amino acids of each construct indicated above the blot). Interacting HA-DbpA is  
577 visualized by immunoblotting with anti-HA antibodies, and is decreased in the  
578 presence of competing ZO-1 fragments. **(f)** Immunoblot showing titration of  
579 competition pulldowns using increasing amounts of either GFP, or the indicated GFP-  
580 tagged fragments of ZO-1 C-terminal region (indicated on the left). **(g)** Plot showing  
581 quantification (by densitometry analysis of immunoblots) of HA-DbpA bound to  
582 ZPSG-1 from the experiment shown in **(e)**, as a function of volume of HEK293T  
583 lysate containing the competing protein. The amounts of competing proteins were  
584 normalized by immunoblotting (Fig. 6b).

585 **(h-j)** Occludin and C-terminal regions of ZO-1 compete for binding to the ZPSG-1  
586 domain. **(h, i)** Immunoblot analyses of pulldowns using GST-ZPSG-1 as a bait, HA-  
587 tagged C-terminal occludin (residues 406-521) as a prey, and increasing amounts of  
588 either GFP-tagged C-terminal ZO-1 fragment (GFP-ZO-1-1619-1748) **(h)** or GFP

589 alone **(i)** as competitors. Normalization of competing proteins for pulldowns is shown  
590 in **(j)**.

591 **(k-m)** Heterodimerization promotes ZO-1 interaction with DbpA. **(k-l)** Immunoblot  
592 analysis of GST pulldowns using GST-DbpA as a bait, and full-length ZO-1 as a  
593 prey, in the presence of increasing amounts ( $\mu$ l of lysate indicated below each lane) of  
594 either vsv-tagged ZO-2 **(k)**, or vsv-tagged p114-RhoGEF **(l)**. **(m)** shows normalized  
595 prey (INPUT) for pulldowns shown in **(k, l)**. Numbers below immunoblots indicate  
596 densitometry quantification of band intensity. Ponceau S staining for bait  
597 normalization is shown below immunoblots.

598 **Figure 7. A model for force- and heterodimerization-dependent stretching of ZO**  
599 **proteins.** ZO-1, ZO-2 are shown schematically, with their structural domains (see  
600 Fig. 1). ZO-1 is shown either in a stretched (a, b, c) or folded (d) conformation. DbpA  
601 is shown in green (a-c) or yellow (d). Actomyosin filaments are schematically shown  
602 as red lines, the number of lines proportional to tension/contractility. Claudin, JAM  
603 and occludin proteins are also schematically shown as transmembrane proteins, with  
604 their cytoplasmic C-terminal regions interacting with the PDZ1, PDZ3 and GUK  
605 regions of ZO-1, respectively. **(a)** Actomyosin tension and heterodimerization  
606 maintain ZO proteins in a stretched conformation, promoting DbpA and occludin  
607 binding to the ZPSG domain. **(b)** Under lower tension conditions ZO proteins are  
608 maintained in the stretched conformation through heterodimerization. **(c)** Upon  
609 depletion of ZO-2, ZO-1 is maintained in the stretched conformation when  
610 actomyosin tension is higher (e.g. growth of cells in 2D on glass coverslips). **(d)**  
611 Lower actomyosin tension (e.g. 3D culture in Matrigel, or treatment of 2D cultures  
612 with blebbistatin) combined with expression of only one ZO protein leads to reduced  
613 junctional accumulation of occludin and DbpA, and degradation of DbpA. In the  
614 presence of the proteasome inhibitor MG132, DbpA is not degraded, but is  
615 translocated to the nucleus, where it regulates target gene transcription (Fig. 4a-b).

616

617

618

619

620

621 **REFERENCES**

622

623

- 624 1. Vogel, V. & Sheetz, M. Local force and geometry sensing regulate cell  
625 functions. *Nat Rev Mol Cell Biol* **7**, 265-275 (2006).
- 626 2. LeGoff, L. & Lecuit, T. Mechanical Forces and Growth in Animal Tissues.  
627 *Cold Spring Harb Perspect Biol* **8**, a019232 (2015).
- 628 3. Lecuit, T. & Yap, A.S. E-cadherin junctions as active mechanical integrators  
629 in tissue dynamics. *Nat Cell Biol* **17**, 533-539 (2015).
- 630 4. Meza, I., Sabenero, M., Stefoni, E. & Cereijido, M. Occluding junctions in  
631 MDCK cells: modulation of transepithelial permeability by the cytoskeleton.  
632 *J. Cell. Biochem.* **18**, 407-421 (1982).
- 633 5. Miyake, Y. *et al.* Actomyosin tension is required for correct recruitment of  
634 adherens junction components and zonula occludens formation. *Exp Cell Res*  
635 **312**, 1637-1650 (2006).
- 636 6. Twiss, F. *et al.* Vinculin-dependent Cadherin mechanosensing regulates  
637 efficient epithelial barrier formation. *Biology open* **1**, 1128-1140 (2012).
- 638 7. le Duc, Q. *et al.* Vinculin potentiates E-cadherin mechanosensing and is  
639 recruited to actin-anchored sites within adherens junctions in a myosin II-  
640 dependent manner. *J Cell Biol* **189**, 1107-1115 (2010).
- 641 8. Yonemura, S., Wada, Y., Watanabe, T., Nagafuchi, A. & Shibata, M. alpha-  
642 Catenin as a tension transducer that induces adherens junction development.  
643 *Nat Cell Biol* **12**, 533-542 (2010).
- 644 9. del Rio, A. *et al.* Stretching single talin rod molecules activates vinculin  
645 binding. *Science* **323**, 638-641 (2009).
- 646 10. Ithychanda, S.S. & Qin, J. Evidence for multisite ligand binding and stretching  
647 of filamin by integrin and migfilin. *Biochemistry* **50**, 4229-4231 (2011).
- 648 11. Miralles, F., Posern, G., Zaromytidou, A.I. & Treisman, R. Actin dynamics  
649 control SRF activity by regulation of its coactivator MAL. *Cell* **113**, 329-342  
650 (2003).
- 651 12. Dupont, S. *et al.* Role of YAP/TAZ in mechanotransduction. *Nature* **474**, 179-  
652 183 (2011).
- 653 13. Nie, M., Balda, M.S. & Matter, K. Stress- and Rho-activated ZO-1-associated  
654 nucleic acid binding protein binding to p21 mRNA mediates stabilization,  
655 translation, and cell survival. *Proc Natl Acad Sci U S A* **109**, 10897-10902  
656 (2012).
- 657 14. Benham-Pyle, B.W., Pruitt, B.L. & Nelson, W.J. Cell adhesion. Mechanical  
658 strain induces E-cadherin-dependent Yap1 and beta-catenin activation to drive  
659 cell cycle entry. *Science* **348**, 1024-1027 (2015).
- 660 15. Fanning, A.S., Jameson, B.J., Jesaitis, L.A. & Anderson, J.M. The Tight  
661 Junction Protein ZO-1 Establishes a Link between the Transmembrane Protein  
662 Occludin and the Actin Cytoskeleton. *J Biol Chem* **273**, 29745-29753 (1998).
- 663 16. Itoh, M., Nagafuchi, A., Moroi, S. & Tsukita, S. Involvement of ZO-1 in  
664 cadherin-based cell adhesion through its direct binding to alpha catenin and  
665 actin filaments. *J Cell Biol* **138**, 181-192 (1997).

- 666 17. Rodgers, L.S. & Fanning, A.S. Regulation of epithelial permeability by the  
667 actin cytoskeleton. *Cytoskeleton (Hoboken)* **68**, 653-660 (2011).
- 668 18. Stevenson, B.R., Siliciano, J.D., Mooseker, M.S. & Goodenough, D.A.  
669 Identification of ZO-1: a high molecular weight polypeptide associated with  
670 the tight junction (zonula occludens) in a variety of epithelia. *J. Cell Biol.* **103**,  
671 755-766 (1986).
- 672 19. Gumbiner, B., Lowenkopf, T. & Apatira, D. Identification of a 160 kDa  
673 polypeptide that binds to the tight junction protein ZO-1. *Proc. Natl. Acad.*  
674 *Sci. USA* **88**, 3460-3464 (1991).
- 675 20. Willott, E. *et al.* The tight junction protein ZO-1 is homologous to the  
676 *Drosophila* discs-large tumor suppressor protein of septate junctions. *Proc.*  
677 *Natl. Acad. Sci. USA* **90**, 7834-7838 (1993).
- 678 21. Ebnet, K., Schulz, C.U., Meyer Zu Brickwedde, M.K., Pendl, G.G. &  
679 Vestweber, D. Junctional Adhesion Molecule (JAM) interacts with the PDZ  
680 domain containing proteins AF-6 and ZO-1. *J Biol Chem* **275**, 27979-27988  
681 (2000).
- 682 22. Bazzoni, G. *et al.* Interaction of junctional adhesion molecule with the tight  
683 junction components ZO-1, cingulin, and occludin. *J Biol Chem* **275**, 20520-  
684 20526 (2000).
- 685 23. Furuse, M. *et al.* Direct association of occludin with ZO-1 and its possible  
686 involvement in the localization of occludin at tight junctions. *J. Cell Biol.* **127**,  
687 1617-1626 (1994).
- 688 24. Itoh, M. *et al.* Direct binding of three tight junction-associated MAGUKs, ZO-  
689 1, ZO-2, and ZO-3, with the COOH termini of claudins. *J Cell Biol* **147**, 1351-  
690 1363 (1999).
- 691 25. Umeda, K. *et al.* ZO-1 and ZO-2 Independently Determine Where Claudins  
692 Are Polymerized in Tight-Junction Strand Formation. *Cell* **126**, 741-754  
693 (2006).
- 694 26. Wittchen, E.S., Haskins, J. & Stevenson, B.R. Protein interactions at the tight  
695 junction. Actin has multiple binding partners, and zo-1 forms independent  
696 complexes with zo-2 and zo-3. *J Biol Chem* **274**, 35179-35185 (1999).
- 697 27. Muller, S.L. *et al.* The tight junction protein occludin and the adherens  
698 junction protein alpha-catenin share a common interaction mechanism with  
699 ZO-1. *J Biol Chem* **280**, 3747-3756 (2005).
- 700 28. Haskins, J., Gu, L., Wittchen, E.S., Hibbard, J. & Stevenson, B.R. ZO-3, a  
701 novel member of the MAGUK protein family found at the tight junction,  
702 interacts with ZO-1 and occludin. *J Cell Biol* **141**, 199-208 (1998).
- 703 29. Balda, M.S. & Matter, K. The tight junction protein ZO-1 and an interacting  
704 transcription factor regulate ErbB-2 expression. *Embo J* **19**, 2024-2033  
705 (2000).
- 706 30. Fanning, A.S. & Anderson, J.M. Zonula occludens-1 and -2 are cytosolic  
707 scaffolds that regulate the assembly of cellular junctions. *Ann N Y Acad Sci*  
708 **1165**, 113-120 (2009).
- 709 31. Chen, Y., Merzdorf, C., Paul, D.L. & Goodenough, D.A. COOH terminus of  
710 occludin is required for tight junction barrier function in early xenopus  
711 embryos. *J Cell Biol* **138**, 891-899 (1997).
- 712 32. Huber, D., Balda, M.S. & Matter, K. Occludin modulates transepithelial  
713 migration of neutrophils. *J Biol Chem* **275**, 5773-5778 (2000).
- 714 33. Saitou, M. *et al.* Complex phenotype of mice lacking occludin, a component  
715 of tight junction strands. *Mol Biol Cell* **11**, 4131-4142. (2000).



- 716 34. Balda, M.S., Garrett, M.D. & Matter, K. The ZO-1-associated Y-box factor  
717 ZONAB regulates epithelial cell proliferation and cell density. *J Cell Biol* **160**,  
718 423-432 (2003).
- 719 35. Sourisseau, T. *et al.* Regulation of PCNA and cyclin D1 expression and  
720 epithelial morphogenesis by the ZO-1-regulated transcription factor  
721 ZONAB/DbpA. *Mol Cell Biol* **26**, 2387-2398 (2006).
- 722 36. Spadaro, D. *et al.* ZO Proteins Redundantly Regulate the Transcription Factor  
723 DbpA/ZONAB. *J Biol Chem* **289**, 22500-22511 (2014).
- 724 37. Soderberg, O. *et al.* Characterizing proteins and their interactions in cells and  
725 tissues using the in situ proximity ligation assay. *Methods* **45**, 227-232 (2008).
- 726 38. Chen, H. *et al.* Improved high-force magnetic tweezers for stretching and  
727 refolding of proteins and short DNA. *Biophys J* **100**, 517-523 (2011).
- 728 39. Le, S., Liu, R., Lim, C.T. & Yan, J. Uncovering mechanosensing mechanisms  
729 at the single protein level using magnetic tweezers. *Methods* **94**, 13-18 (2016).
- 730 40. Fanning, A.S., Jameson, B.T. & Anderson, J.M. Molecular interactions among  
731 the tight junction proteins ZO-1, ZO-2 and occludin. *Mol. Biol. Cell* **7**, 607a  
732 (Abstr.) (1996).
- 733 41. McCarthy, K.M. *et al.* Occludin is a functional component of the tight  
734 junction. *J. Cell Sci.* **109**, 2287-2298 (1996).
- 735 42. Balda, M.S., Flores-Maldonado, C., Cerejido, M. & Matter, K. Multiple  
736 domains of occludin are involved in the regulation of paracellular  
737 permeability. *J Cell Biochem* **78**, 85-96 (2000).
- 738 43. Umeda, K. *et al.* Establishment and characterization of cultured epithelial cells  
739 lacking expression of ZO-1. *J Biol Chem* **279**, 44785-44794 (2004).
- 740 44. Ladoux, B. *et al.* Strength dependence of cadherin-mediated adhesions.  
741 *Biophys J* **98**, 534-542 (2010).
- 742 45. Ladoux, B., Nelson, W.J., Yan, J. & Mege, R.M. The mechanotransduction  
743 machinery at work at adherens junctions. *Integr Biol (Camb)* **7**, 1109-1119  
744 (2015).
- 745 46. Regnier, M., Rivera, A.J., Chen, Y. & Chase, P.B. 2-deoxy-ATP enhances  
746 contractility of rat cardiac muscle. *Circ Res* **86**, 1211-1217 (2000).
- 747 47. Schoffstall, B. & Chase, P.B. Increased intracellular [dATP] enhances cardiac  
748 contraction in embryonic chick cardiomyocytes. *J Cell Biochem* **104**, 2217-  
749 2227 (2008).
- 750 48. Fanning, A.S., Van Itallie, C.M. & Anderson, J.M. Zonula occludens-1 and -2  
751 regulate apical cell structure and the zonula adherens cytoskeleton in polarized  
752 epithelia. *Mol Biol Cell* **23**, 577-590 (2012).
- 753 49. Yamazaki, Y. *et al.* ZO-1- and ZO-2-dependent integration of myosin-2 to  
754 epithelial zonula adherens. *Mol Biol Cell* **19**, 3801-3811 (2008).
- 755 50. Itoh, M., Tsukita, S., Yamazaki, Y. & Sugimoto, H. Rho GTP exchange factor  
756 ARHGEF11 regulates the integrity of epithelial junctions by connecting ZO-1  
757 and RhoA-myosin II signaling. *Proc Natl Acad Sci U S A* **109**, 9905-9910  
758 (2012).
- 759 51. Tornavaca, O. *et al.* ZO-1 controls endothelial adherens junctions, cell-cell  
760 tension, angiogenesis, and barrier formation. *J Cell Biol* **208**, 821-838 (2015).
- 761 52. Choi, W. *et al.* Remodeling the zonula adherens in response to tension and the  
762 role of afadin in this response. *J Cell Biol* **213**, 243-260 (2016).
- 763 53. Otani, T., Ichii, T., Aono, S. & Takeichi, M. Cdc42 GEF Tuba regulates the  
764 junctional configuration of simple epithelial cells. *J Cell Biol* **175**, 135-146  
765 (2006).



- 766 54. Van Itallie, C.M., Tietgens, A.J., Krystofiak, E., Kachar, B. & Anderson, J.M.  
767 A complex of ZO-1 and the BAR-domain protein TOCA-1 regulates actin  
768 assembly at the tight junction. *Mol Biol Cell* **26**, 2769-2787 (2015).
- 769 55. Maiers, J.L., Peng, X., Fanning, A.S. & DeMali, K.A. ZO-1 recruitment to  
770 alpha-catenin--a novel mechanism for coupling the assembly of tight junctions  
771 to adherens junctions. *J Cell Sci* **126**, 3904-3915 (2013).
- 772 56. Meyer, T.N., Schwesinger, C. & Denker, B.M. Zonula occludens-1 is a  
773 scaffolding protein for signaling molecules.  $\alpha$ (12) directly binds to the  
774 Src homology 3 domain and regulates paracellular permeability in epithelial  
775 cells. *J Biol Chem* **277**, 24855-24858 (2002).
- 776 57. Tsapara, A., Matter, K. & Balda, M.S. The heat-shock protein Apg-2 binds to  
777 the tight junction protein ZO-1 and regulates transcriptional activity of  
778 ZONAB. *Mol Biol Cell* **17**, 1322-1330 (2006).
- 779 58. Etournay, R. *et al.* Shroom2, a myosin-VIIa- and actin-binding protein,  
780 directly interacts with ZO-1 at tight junctions. *J Cell Sci* **120**, 2838-2850  
781 (2007).
- 782 59. Itoh, M. *et al.* The 220kD protein colocalizing with cadherins in non-epithelial  
783 cells is identical to ZO-1, a tight junction-associated protein in epithelial cells:  
784 cDNA cloning and immunoelectron microscopy. *J. Cell Biol.* **121**, 491-502  
785 (1993).
- 786 60. Vorbrodts, A.W. & Dobrogowska, D.H. Molecular anatomy of intercellular  
787 junctions in brain endothelial and epithelial barriers: electron microscopist's  
788 view. *Brain Res Brain Res Rev* **42**, 221-242 (2003).
- 789 61. Shen, L., Weber, C.R. & Turner, J.R. The tight junction protein complex  
790 undergoes rapid and continuous molecular remodeling at steady state. *J Cell*  
791 *Biol* **181**, 683-695 (2008).
- 792 62. Gonzalez-Mariscal, L., Lechuga, S. & Garay, E. Role of tight junctions in cell  
793 proliferation and cancer. *Prog Histochem Cytochem* **42**, 1-57 (2007).
- 794 63. Van Itallie, C.M. & Anderson, J.M. Architecture of tight junctions and  
795 principles of molecular composition. *Semin Cell Dev Biol* **36**, 157-165 (2014).
- 796 64. Howarth, A.G. & Stevenson, B.R. Molecular environment of ZO-1 in  
797 epithelial and non-epithelial cells. *Cell Motil. Cytosk.* **31**, 323-332 (1995).
- 798 65. Katsuno, T. *et al.* Deficiency of Zonula Occludens-1 Causes Embryonic  
799 Lethal Phenotype Associated with Defected Yolk Sac Angiogenesis and  
800 Apoptosis of Embryonic Cells. *Mol Biol Cell* **19**, 2465-2475 (2008).
- 801 66. Xu, J. *et al.* Zona occludens-2 is critical for blood-testis barrier integrity and  
802 male fertility. *Mol Biol Cell* **20**, 4268-4277 (2009).
- 803 67. Guillemot, L. *et al.* MgcRacGAP interacts with cingulin and paracingulin to  
804 regulate Rac1 activation and development of the tight junction barrier during  
805 epithelial junction assembly. *Mol Biol Cell* **25**, 1995-2005 (2014).
- 806

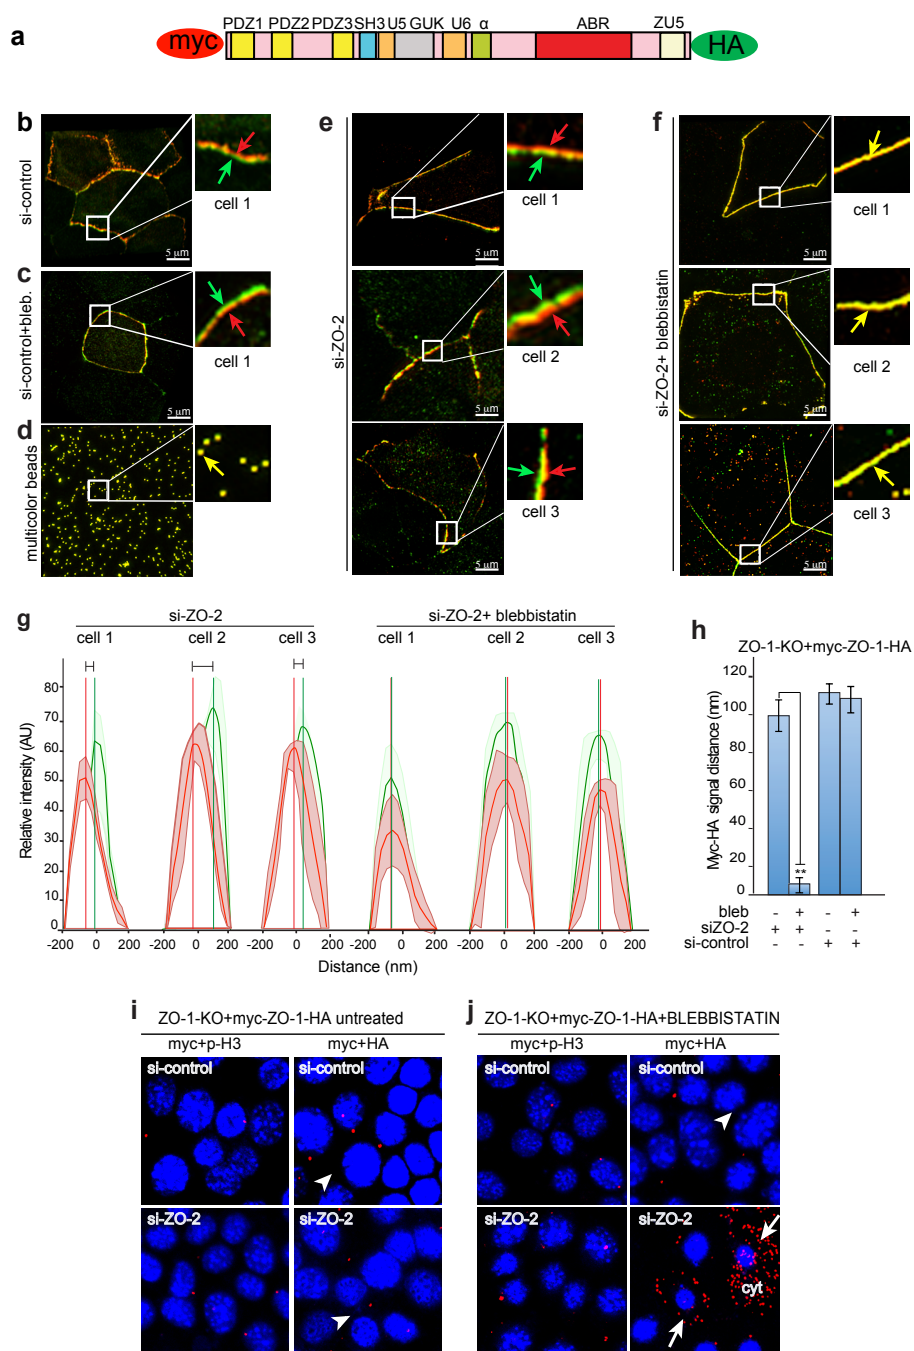

Figure 1 (Citi)

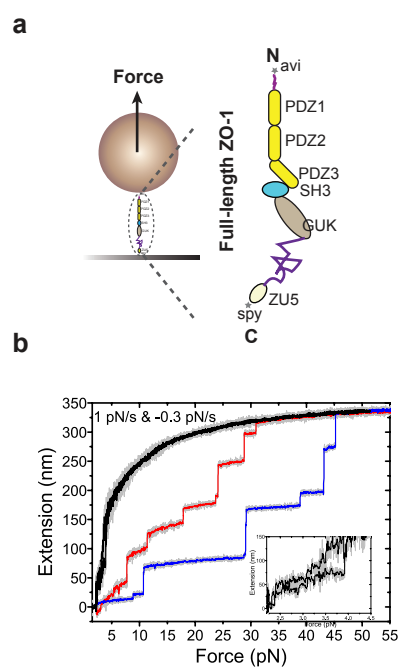

Figure 2 (Citi)

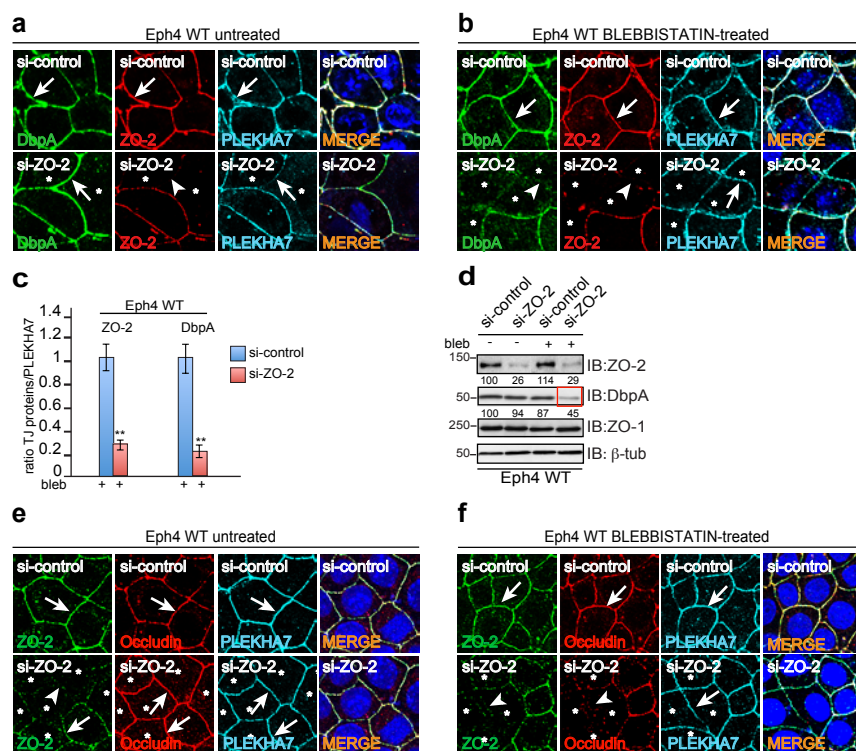

Figure 3 (Citi)

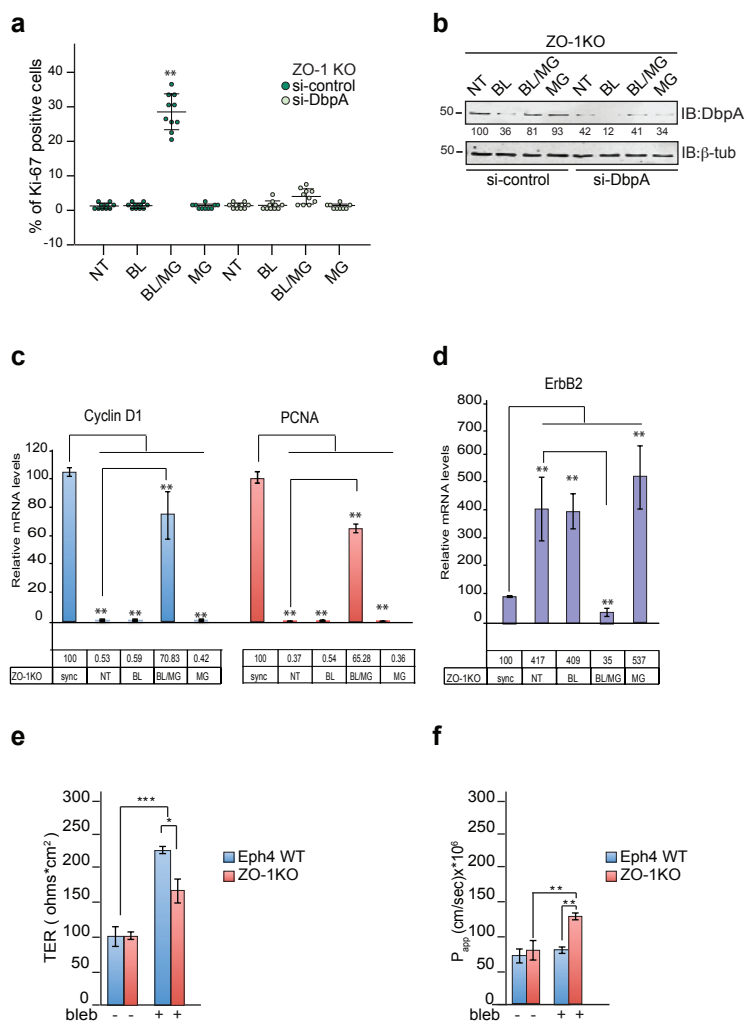

Figure 4 (Citi)

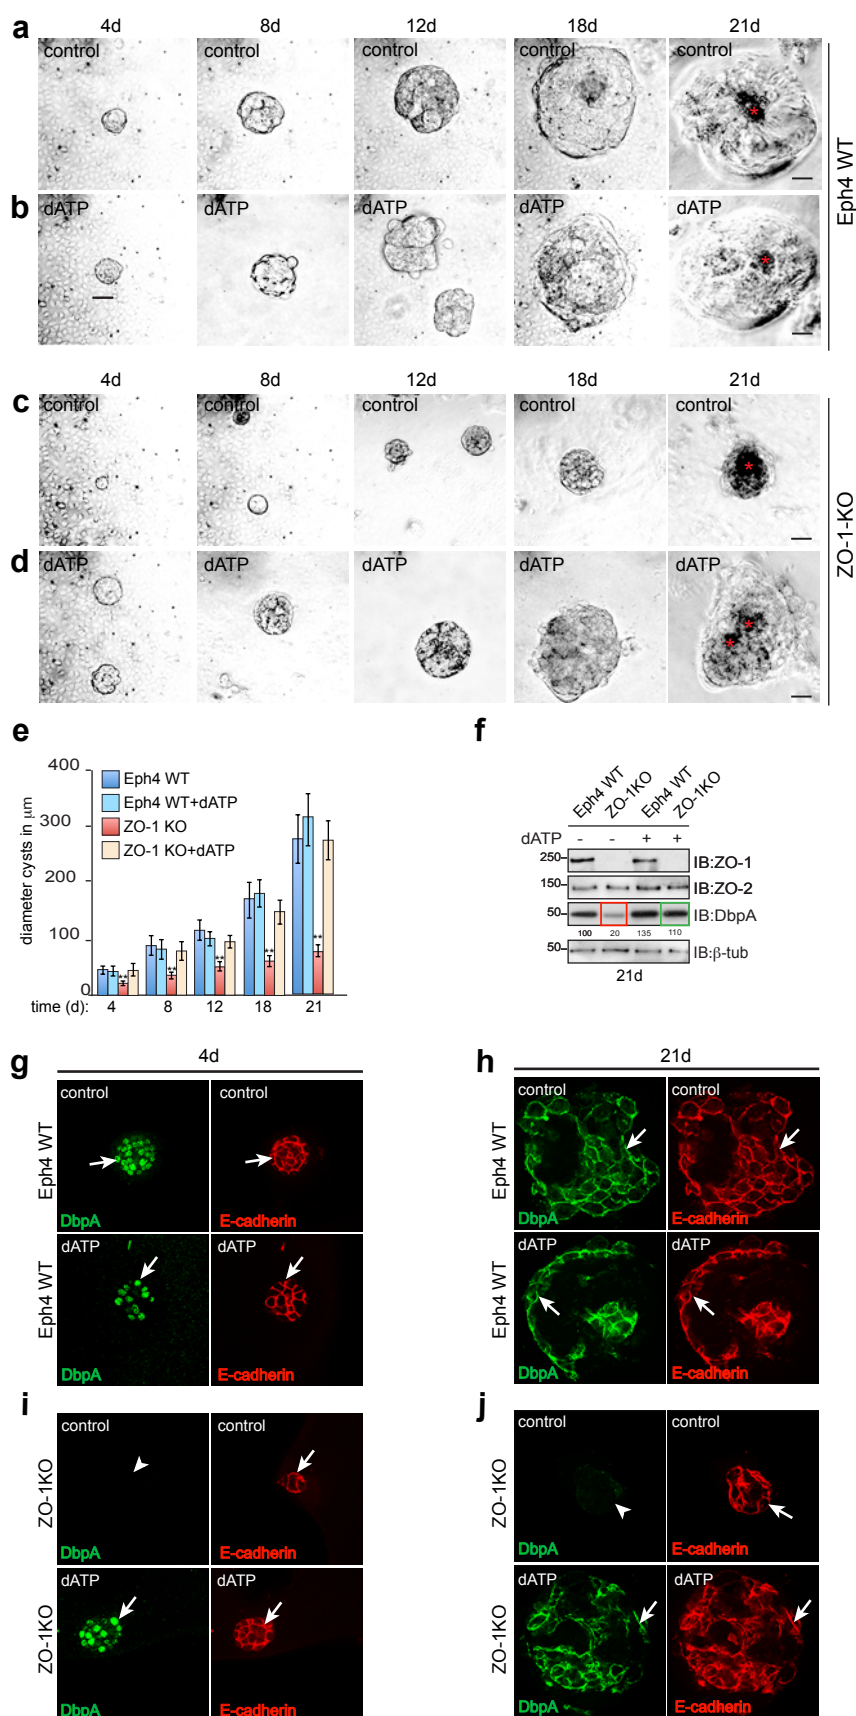

Figure 5 (Citi)

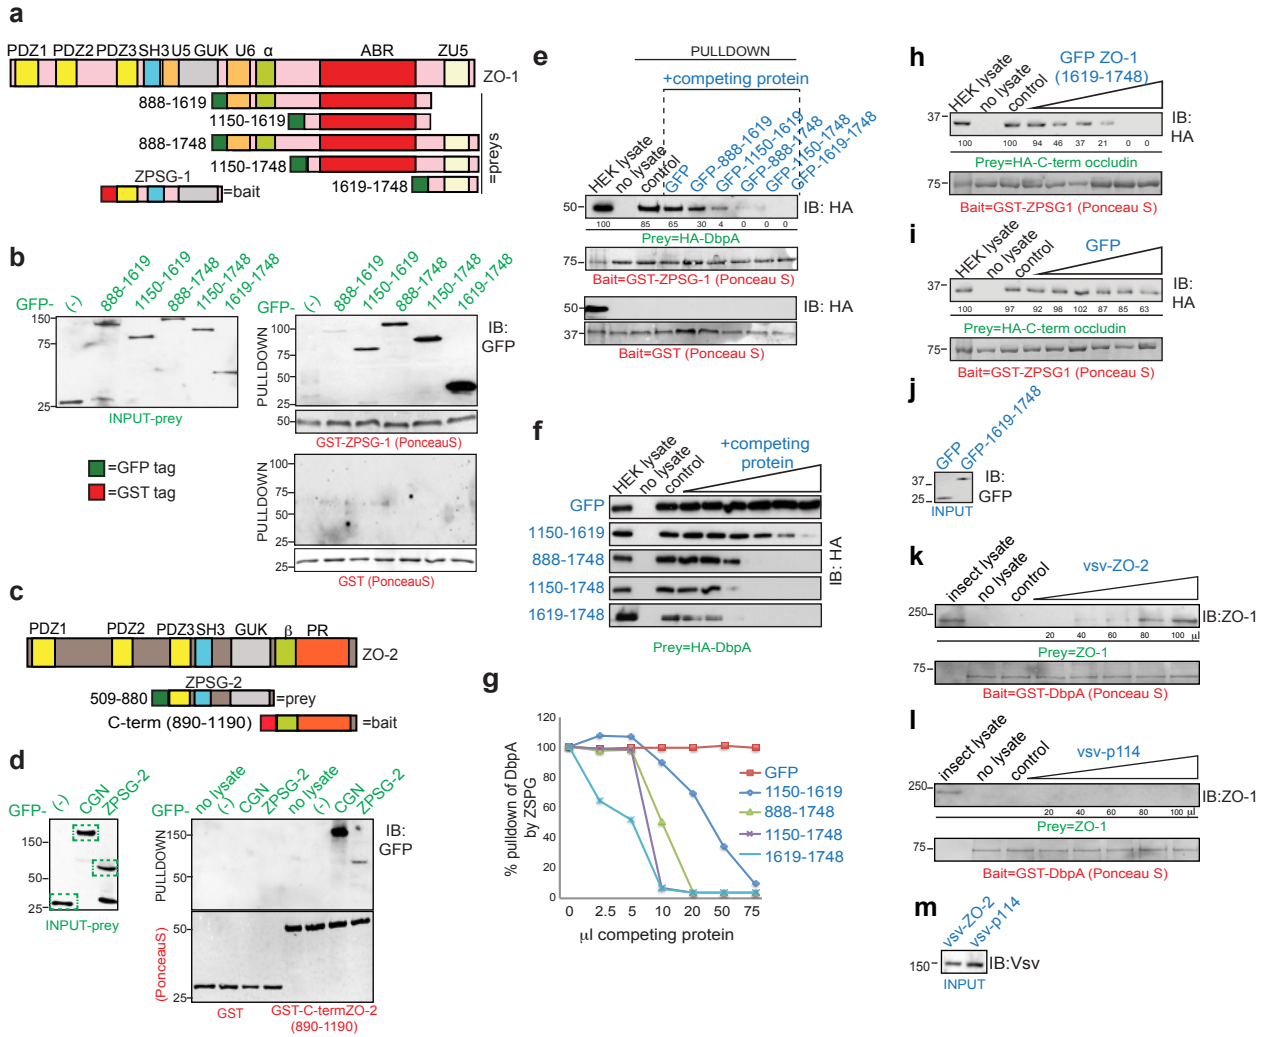

Figure 6 (Citi)



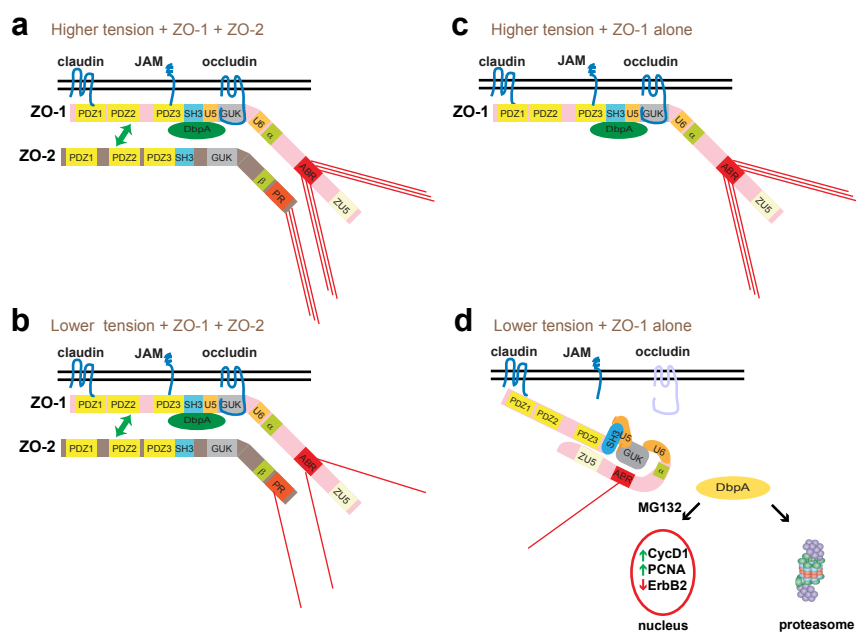

Figure 7 (Citi)
